# Supplementary material for: Controllable switching between stable modes in a small network of pulse-coupled chemical oscillators
Source: Royal Society of Chemistry journal article supplement (doi:10.1039/c8cp07374k), 2019-01-01
Supplement: c8cp07374k1.pdf [file c8cp07374k1.pdf]

## Electronic Supplementary Information

### Controllable switching between stable modes in small network of pulse-coupled chemical oscillators

Pavel S. Smelov, Ivan S. Proskurkin, and Vladimir K. Vanag

Centre for Nonlinear Chemistry, Immanuel Kant Baltic Federal University, Kaliningrad, 236041, Russia

#### Description of the algorithm written in the program LabView.

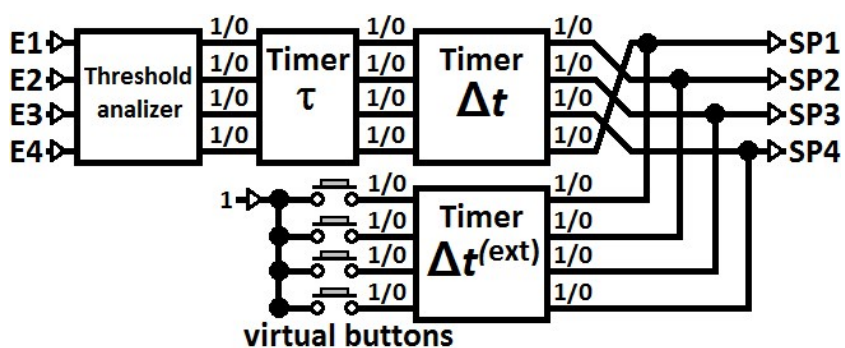

**Figure ESI-1.** The block scheme of the LabView software for unidirectional inhibitory pulse coupling with time delay and external inhibitory pulses.

Analog signals from the photodiode receivers, PD1 - PD4, are converted to the digital E1 - E4 signals, respectively. The module "Threshold analyzer" defines the excess signal  $E$  of the PD receiver over the threshold value  $E_{th} = 8$  V and works as a trigger for the next module. "1/0" means digital line. The module "Timer  $\tau$ " is responsible for the time delay  $\tau$  between the operations of modules "Threshold analyzer" and "Timer  $\Delta t^{(ext)}$ ". The module "Timer  $\Delta t$ " is responsible for the duration of the internal injection  $\Delta t$ , while the module "Timer  $\Delta t^{(ext)}$ " is responsible for the duration of the external pulse injection,  $\Delta t^{(ext)}$ . SP1 - SP4 are digital inputs which operate syringe pumps of the A3 type. "Virtual buttons" is used for controlling external pulses manually. Logical "1" is a constant signal that can be given to the input of a needed channel of module "Timer  $\Delta t^{(ext)}$ " by pressing the corresponding virtual button.

Four lines in each module from top to bottom correspond to oscillators #1 - #4, respectively. Each line in the modules works separately. Let us describe how our algorithm works for the  $j^{\text{th}}$  oscillator ( $j = 1, 2, 3, 4$ ) and corresponding  $j^{\text{th}}$  channel. Signal  $E_j$  of the PD $_j$  comes to the input of the “Threshold analyzer”. If  $E_j$  exceeds the threshold value  $E_{th} = 8 \text{ V}$ , the digital output of the “Threshold analyzer” is equal to “1”, and “0” otherwise. Note that the threshold value  $E_{th}$  can be equated to any value between 5 V and 9 V. The module “Timer  $\tau$ ” starts to count  $\tau$  seconds (time delay), if its input is equal to logical “1”. During this time (time of counting), the “Timer  $\tau$ ” cannot read any input signals. When the counter reaches  $\tau$  seconds, the value of the  $j^{\text{th}}$  output of the “Timer  $\tau$ ” switches from logical “0” to logical “1”. As soon as the input of the next module “Timer  $\Delta t$ ” changes from “0” to “1”, this module starts to count  $\Delta t$  seconds. During this time of counting, the  $j^{\text{th}}$  output of the module “Timer  $\Delta t$ ” is equal to logical “1” and the model cannot read any new  $j^{\text{th}}$  input. Since we use unidirectional coupling on the ring, the  $j^{\text{th}}$  output of the “Timer  $\Delta t$ ” is connected to the input of a syringe pump SP $_{j+1}$  (if  $j = 4, j + 1 = 1$ ). The module “Timer  $\Delta t^{(\text{ext})}$ ” is designed to create short external pulses that can be controlled manually by “virtual buttons”. If the virtual button in the  $j^{\text{th}}$  line is pressed, what is equivalent to setting logical “1” to the  $j^{\text{th}}$  input of the module “Timer  $\Delta t^{(\text{ext})}$ ”, this module starts working by the same manner as module “Timer  $\Delta t$ ”, but with its own time  $\Delta t^{(\text{ext})}$ , which can be changed from one to another experiment.
